# Supplementary material for: Practical Guidelines on Implementing Hypofractionated Radiotherapy for Prostate Cancer in Africa
Source: PubMed Central journal article supplement (PMC8673781; doi:10.3389/fonc.2021.725103), 2021-12-01
Supplement: DataSheet_1.pdf [file DataSheet_1.pdf]

## Supplementary Material

**Supplementary Figure 1.** Global Cancer Observatory estimations on the total African prostate cancer burden, projected up to 2040, measured by annual incidences and mortalities.<sup>2</sup>

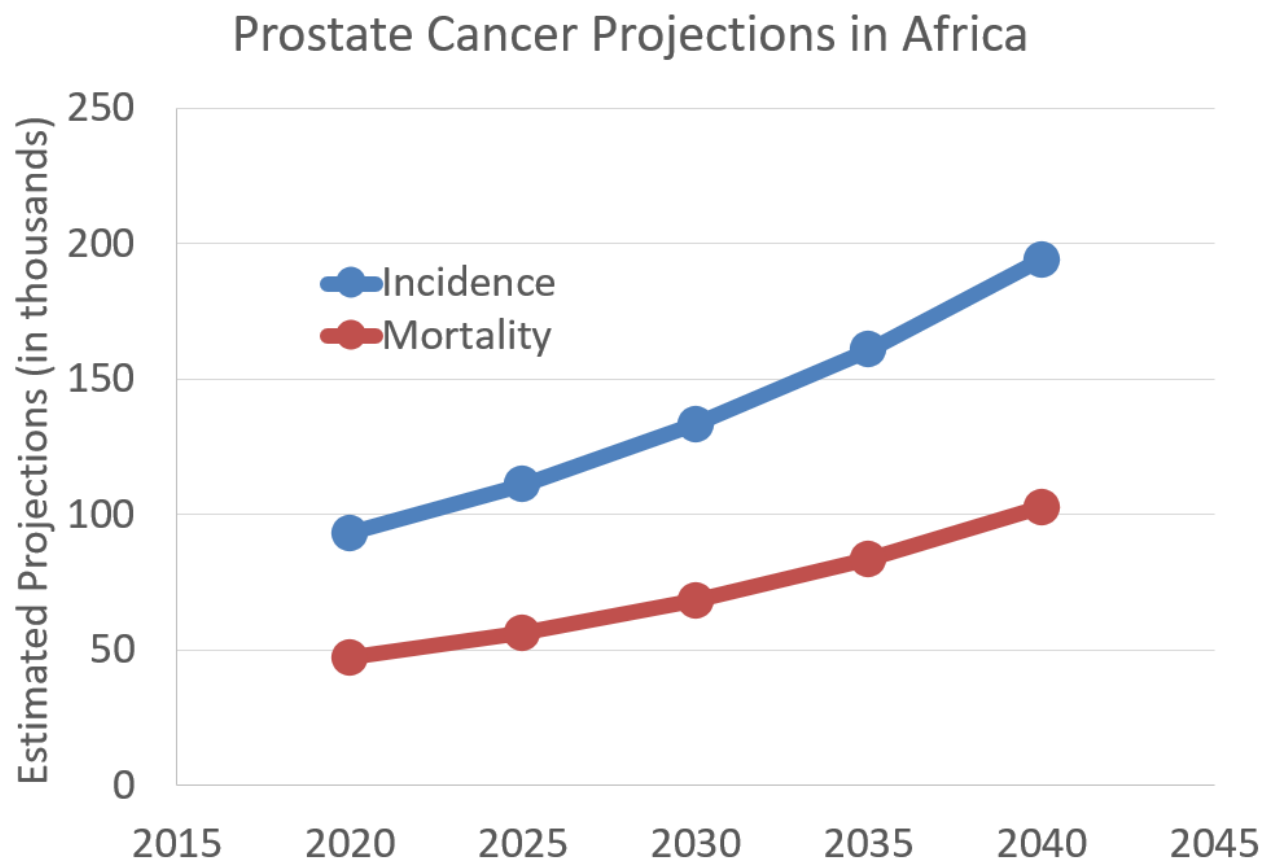

**Supplementary Figure 2.** (A) Number of radiotherapy centers in African countries as reported from the Directory of Radiotherapy Centers.<sup>1</sup> (B) Reported prostate cancer incidences in Africa during 2020 as reported by the Global Cancer Observatory.<sup>2</sup>

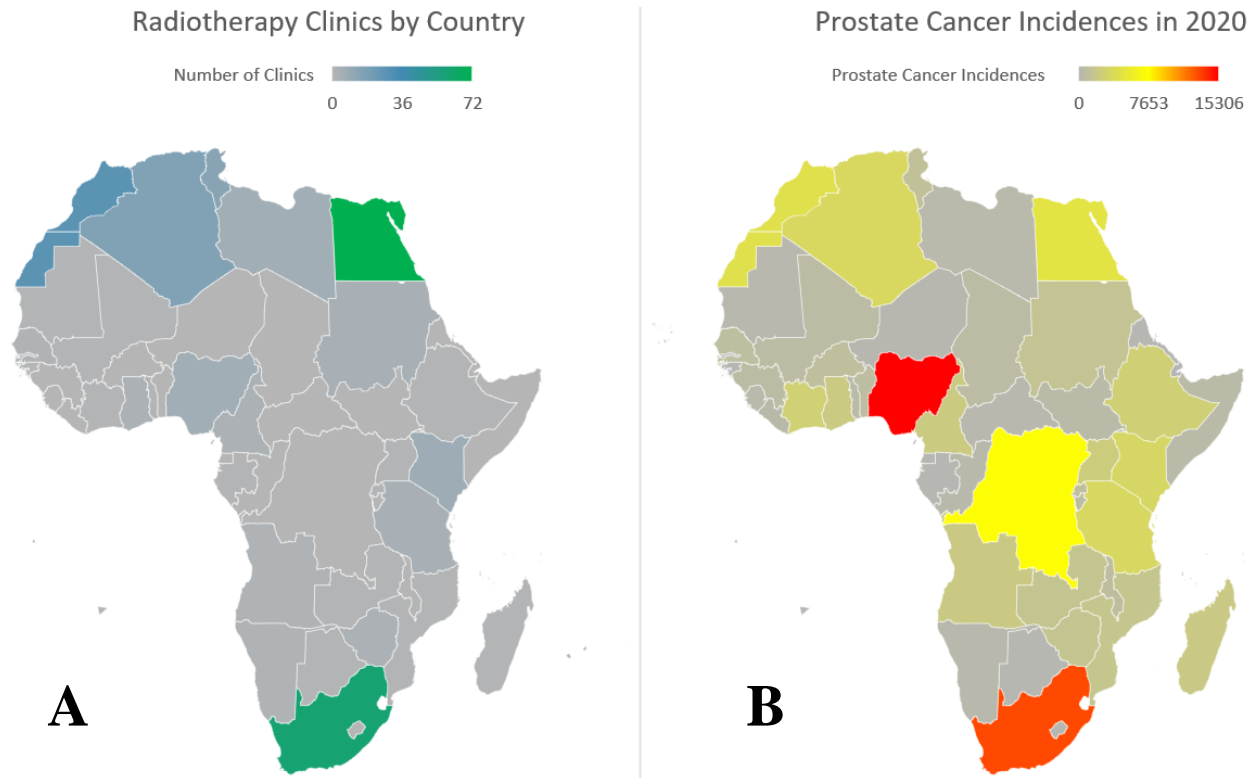

## References

1. International Atomic Energy Agency: Division for Human Health: DIRAC (DIrectory of RAdiotherapy Centres) [updated 12/11/2018] [Internet]. 12/11/2018 , 2018[cited 2019 Oct 23] Available from: <https://dirac.iaea.org/Query/Map2?mapId=2>
2. International Agency for Research on Cancer: Global Cancer Observatory (GLOBOCAN) [Internet]. World Heal Organ 593:1–2, 2018[cited 2019 Jul 1] Available from: <http://gco.iarc.fr/>
